# Supplementary figures and images for: Selective Encapsulation of the Polyphenols on Silk Fibroin Nanoparticles: Optimization Approaches
Source: MDPI journal article supplement (doi:10.3390/ijms24119327), 2023-05-26

## Supplementary data

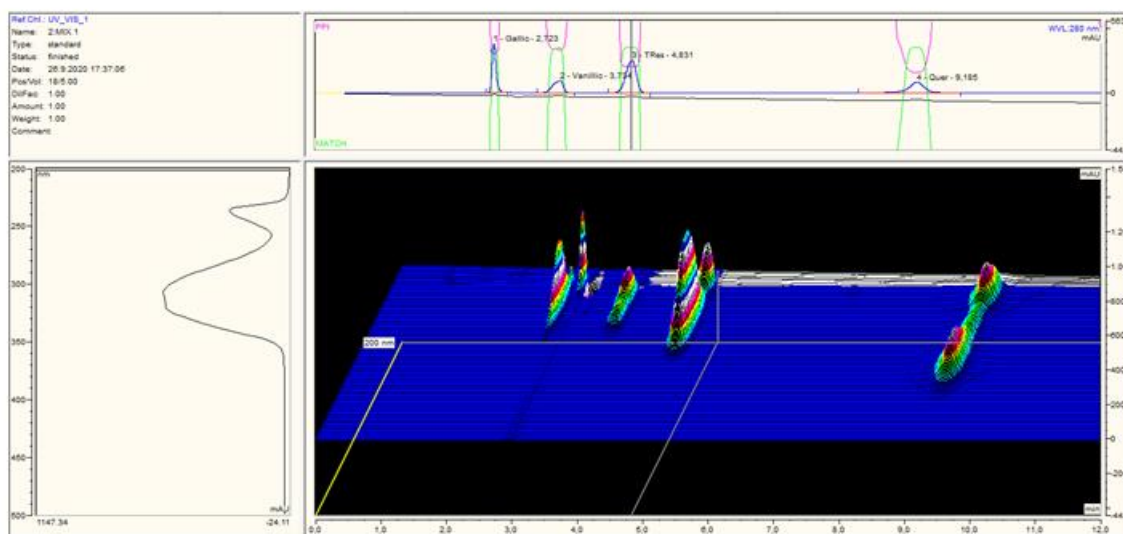

Figure S1. 3D chromatogram of the phenolic compounds of PFmix.

Supplement: s1 [file s1]
